# Supplementary material for: Constructing an all zero-dimensional CsPbBr3/CdSe heterojunction for highly efficient photocatalytic CO2reduction
Source: Royal Society of Chemistry journal article supplement (doi:10.1039/d2ta05186a), 2022-01-01
Supplement: d2ta05186a1.pdf [file d2ta05186a1.pdf]

## Electronic Supplementary Information

### Constructing all Zero-dimensional CsPbBr<sub>3</sub>/CdSe Heterojunction for Highly Efficient Photocatalytic CO<sub>2</sub> Reduction

Guilin Yin,<sup>a</sup> Xiaosi Qi,<sup>a</sup> Yanli Chen,<sup>a</sup> Qiong Peng,<sup>a</sup> Xingxing Jang,<sup>b</sup> Qinglong Wang,<sup>\*c</sup>  
Wenhua Zhang,<sup>\*d</sup> Xiu Gong,<sup>\*a</sup>

<sup>a</sup>College of Physics, & Guizhou Province Key Laboratory for Optoelectronic Technology and Application, Guizhou University, Guiyang 550025, China

<sup>b</sup>College of Chemistry and Environmental Engineering, Shenzhen University, Shenzhen, Guangdong 518060, China

<sup>c</sup>National & Local Joint Engineering Research Center for Applied Technology of Hybrid Nanomaterials, Henan University, Kaifeng 475004, China

<sup>d</sup>Yunnan Key Laboratory of Carbon Neutrality and Green Low-carbon Technologies, School of Materials and Energy, Yunnan University, Kunming 650500, China.

\*Corresponding author.

E-mail: [xgong@gzu.edu.cn](mailto:xgong@gzu.edu.cn); [qlwang2021@163.com](mailto:qlwang2021@163.com); [wenhuazhang@ynu.edu.cn](mailto:wenhuazhang@ynu.edu.cn);

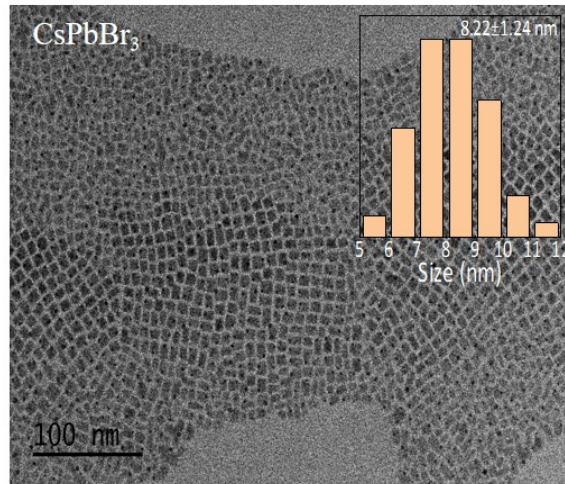

**Fig. S1** TEM image of CsPbBr<sub>3</sub> QDs (size:  $8.2 \pm 1.2$  nm) Insets are corresponding histogram of the size distribution.

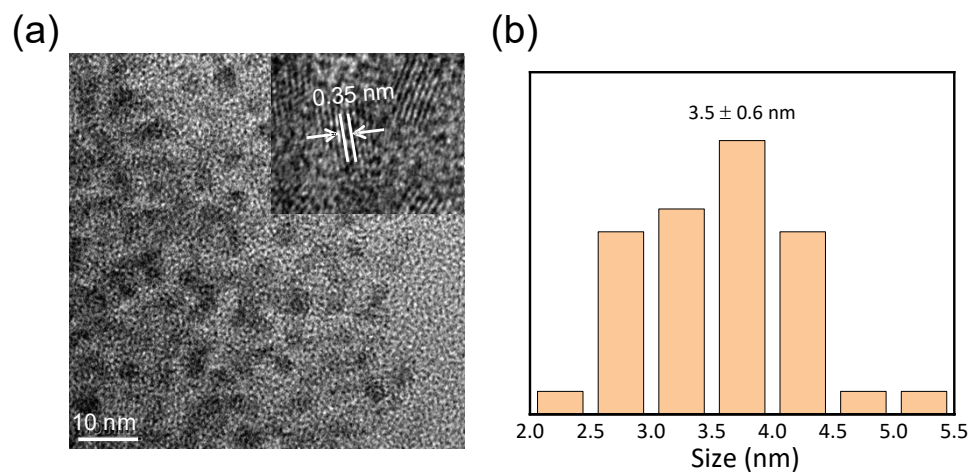

**Fig. S2** (a) TEM images of CdSe QDs; (b) The average sizes of CdSe QDs.

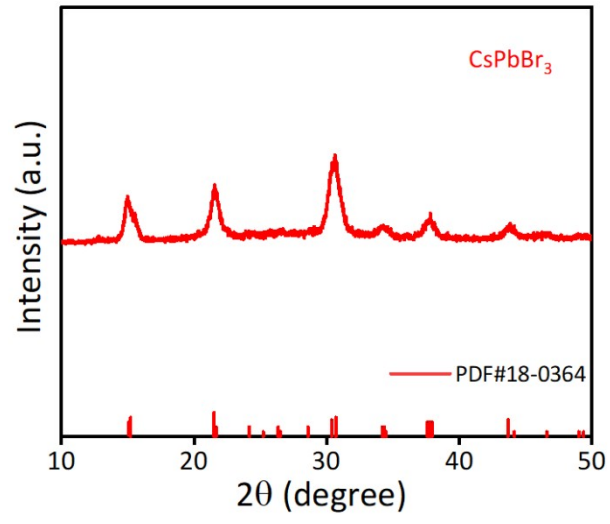

**Fig. S3** XRD patterns of the CsPbBr<sub>3</sub>.

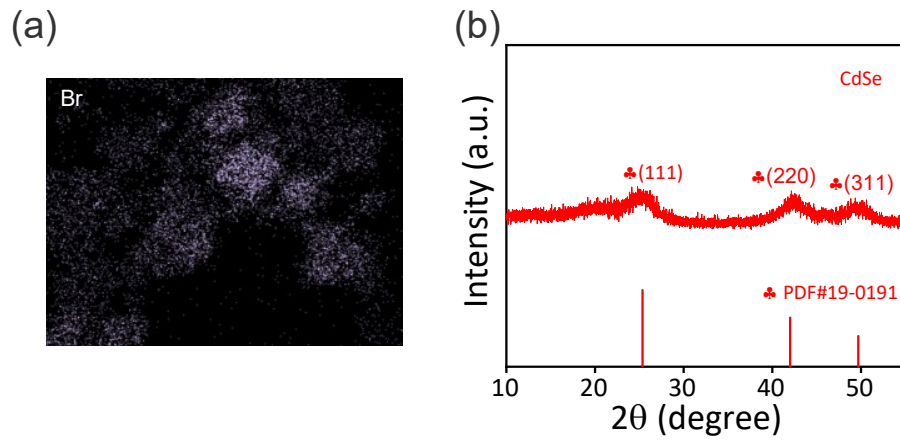

**Fig. S4** (a) Br element mapping of CsPbBr<sub>3</sub>/CdSe heterojunction. (b) XRD patterns of the CdSe QDs.

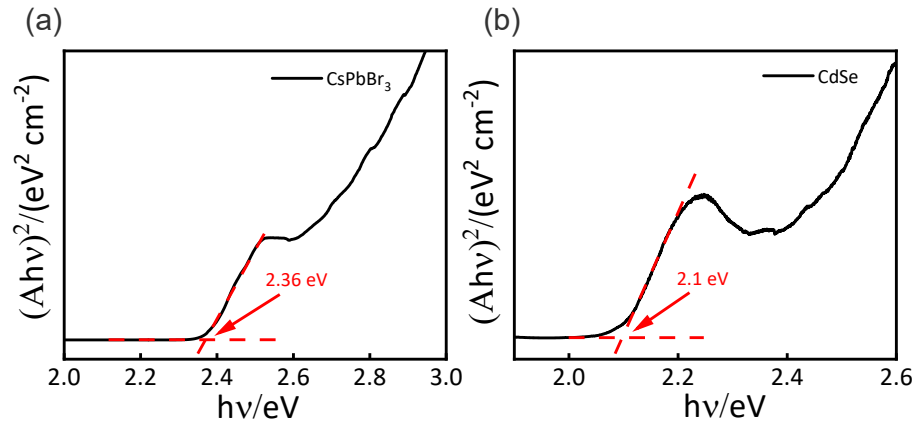

**Fig. S5** (a) Tauc plot of the prepared CsPbBr<sub>3</sub> and (b) CdSe QDs for determining their optical bandgaps.

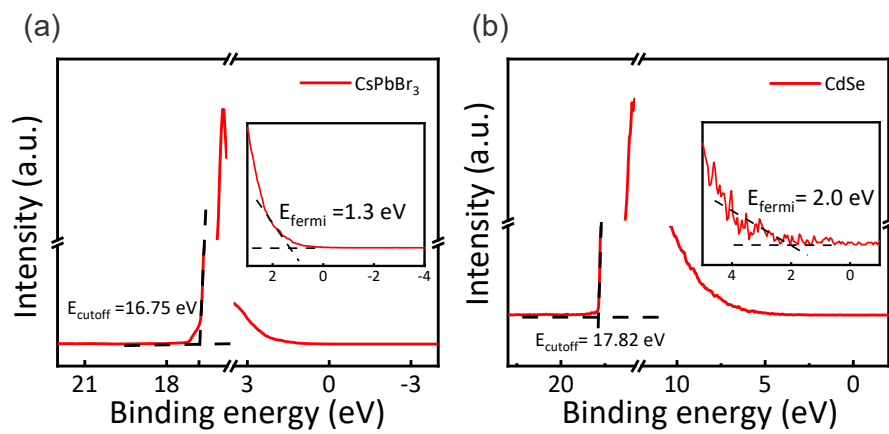

**Fig. S6** UPS spectra of CsPbBr<sub>3</sub> QDs and CdSe QDs.

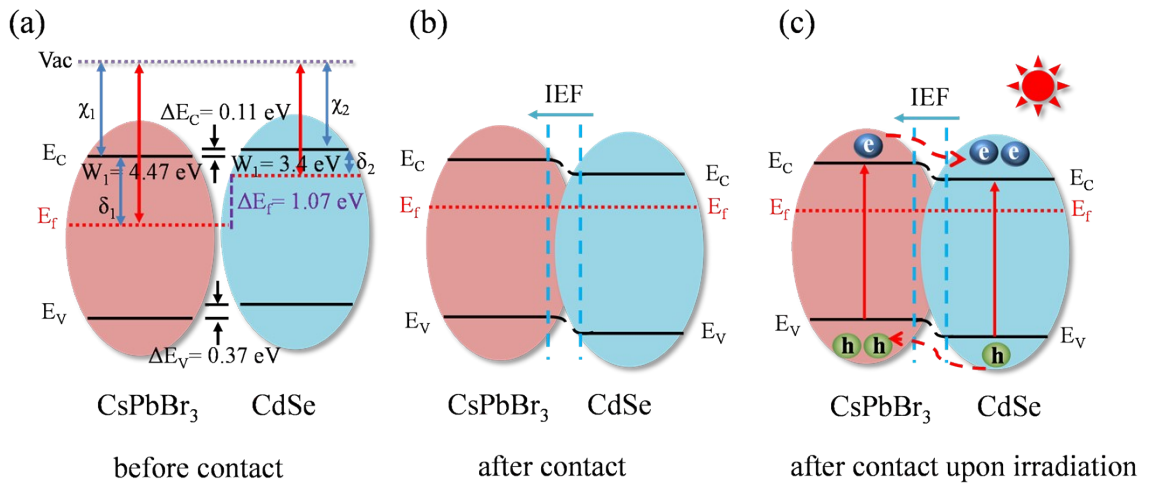

**Fig. S7** Illustration of band structures of CsPbBr<sub>3</sub>/CdSe heterojunction.

Fig. S7a illustrated that the electrons in CdSe with higher Fermi levels would spontaneously diffuse to CsPbBr<sub>3</sub> with lower Fermi levels to achieve an equalization of their Fermi levels. The simultaneously generated built-in IEF facilitates the separation of photogenerated electrons and holes. Moreover, the band edge of CdSe will bend upward owing to the loss of electrons, while that of CsPbBr<sub>3</sub> will inversely bend downward. Upon light illumination, as shown in Fig S7c, the staggered band alignment can result in type-II heterojunction interfaces, which would lead to the opposite electron transfer routes. <sup>[1-3]</sup>



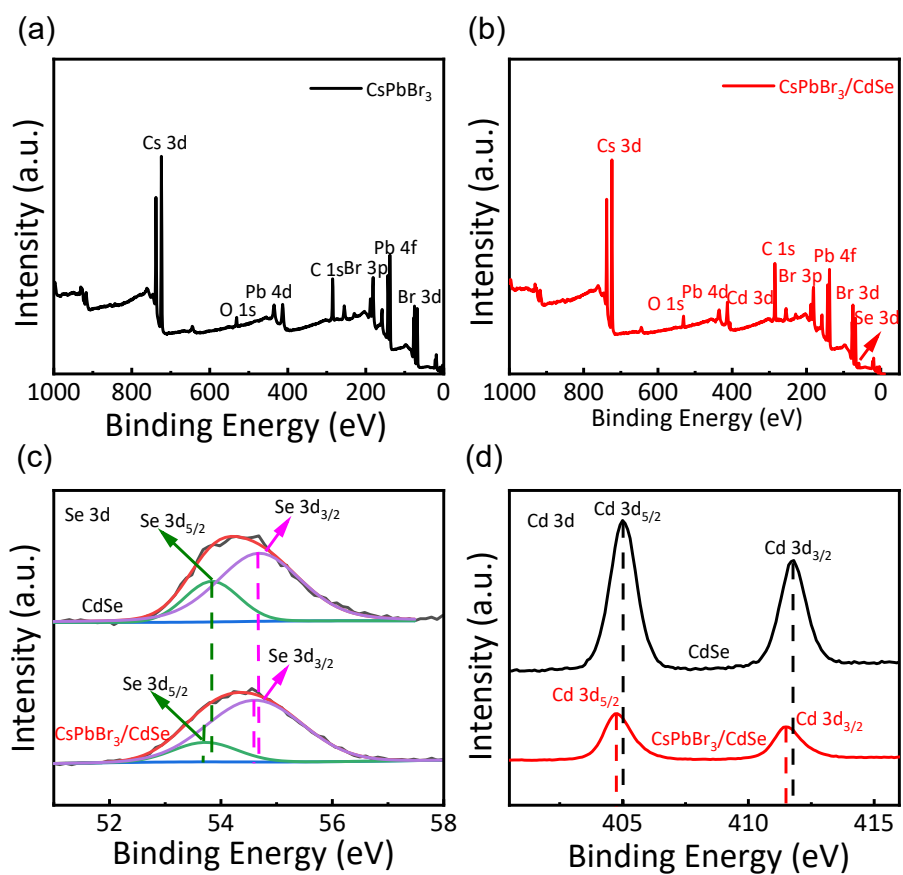

**Fig. S8** Survey XPS spectra of CsPbBr<sub>3</sub> QDs (a) and CsPbBr<sub>3</sub>/CdSe heterojunction (b); XPS spectra of CsPbBr<sub>3</sub>/CdSe heterojunction: (c) Se 3d spectra; (d) Cd 3d spectra

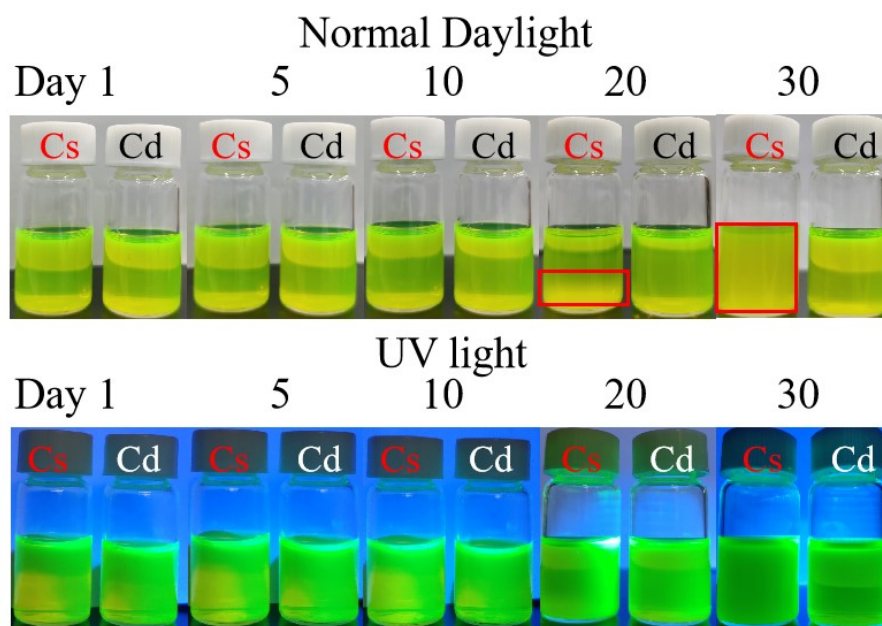

**Fig. S9** Photographs evolution of the CsPbBr<sub>3</sub> and CsPbBr<sub>3</sub>/CdSe heterojunction in normal daylight and UV light after aging for 30 days. The same concentration of both CsPbBr<sub>3</sub> QDs and CsPbBr<sub>3</sub>/CdSe heterojunction.

The CsPbBr<sub>3</sub>/CdSe solution exhibited more clarification and high luminescence brightness, while the control CsPbBr<sub>3</sub> QDs solution was relatively turbidity, indicating severe degradation and aggregation of QDs due to the OA surface ligand loss or damage after aging for 30 days.<sup>[4]</sup> These results clearly show that the heterojunction CsPbBr<sub>3</sub>/CdSe heterojunction demonstrated has higher stability than single CsPbBr<sub>3</sub> QDs.

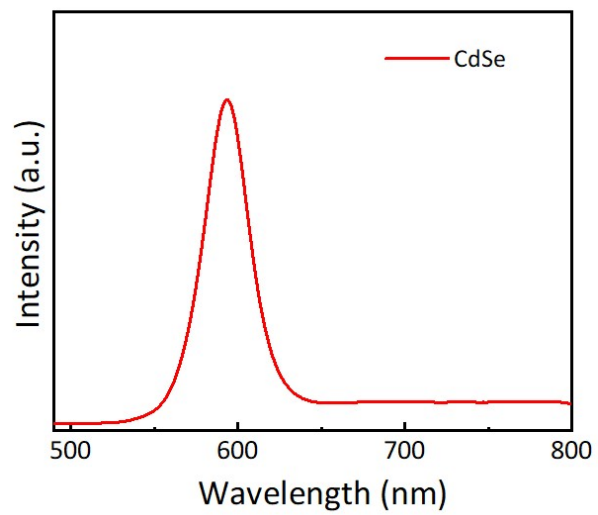

**Fig. S10** PL spectra of CdSe QDs.

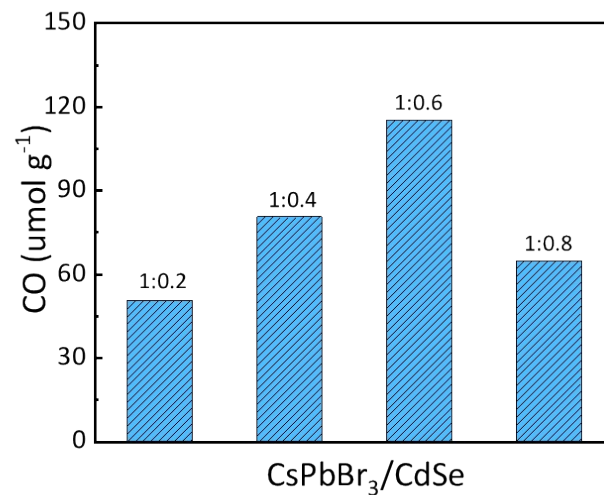

**Fig. S11** Photocatalytic CO<sub>2</sub> reduction by using CsPbBr<sub>3</sub>/CdSe heterojunction with various mole ratios of CsPbBr<sub>3</sub> and CdSe after 3 h of photocatalytic reaction.

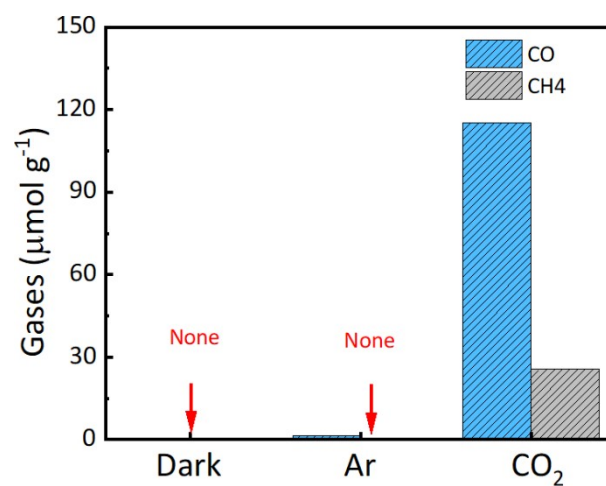

**Fig. S12** Control photocatalytic tests using CsPbBr<sub>3</sub>/CdSe as catalysts under CO<sub>2</sub> atmosphere with the dark condition; under Ar atmosphere with light irradiation; and under CO<sub>2</sub> atmosphere with light irradiation after 3h.

The control photocatalytic experiments show that the traces of CO were detected under Ar atmosphere (Fig. S10), which may be related to the partial photooxidation of ethyl acetate. <sup>[5-7]</sup>

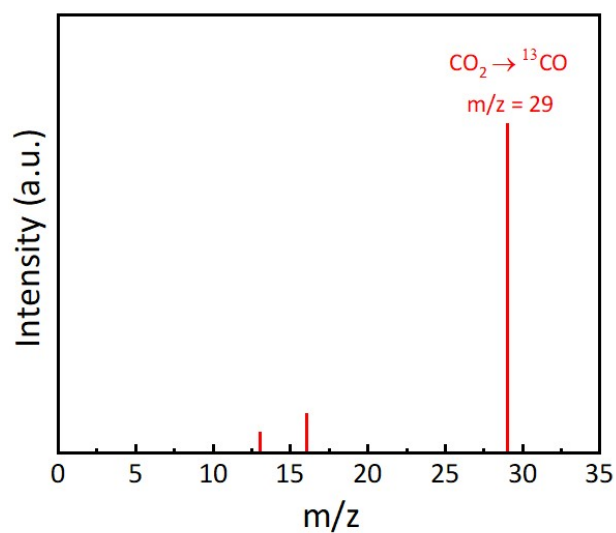

**Fig. S13** Mass spectra from <sup>13</sup>CO (m/z=29) produced over CsPbBr<sub>3</sub>/CdSe catalyst in the photocatalytic reduction of <sup>13</sup>CO<sub>2</sub>.

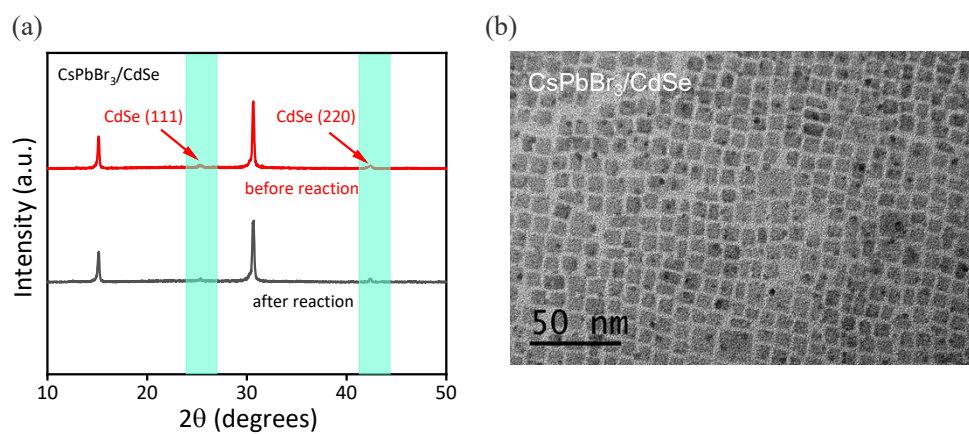

**Fig. S14** (a) XRD patterns of CsPbBr<sub>3</sub>/CdSe QDs before and after the photocatalytic reaction; (b) TEM image of CsPbBr<sub>3</sub>/CdSe QDs after the photocatalytic reaction. The CsPbBr<sub>3</sub>/CdSe QDs were maintained after three catalytic runs.

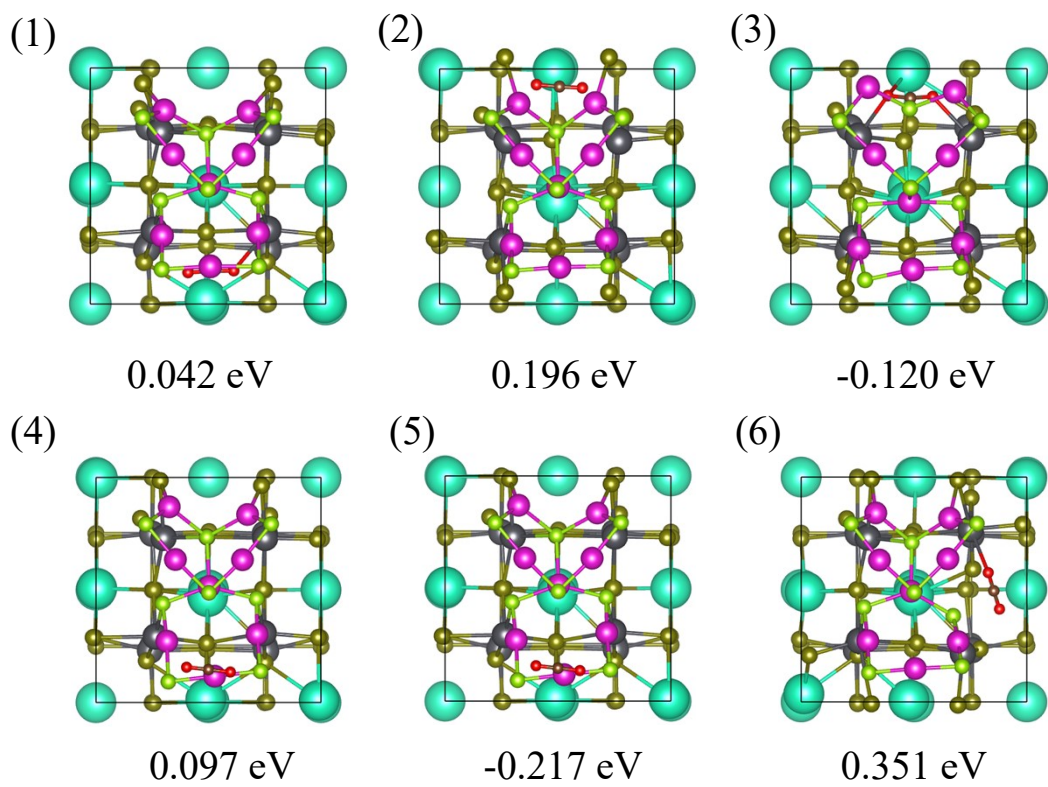

**Fig. S15** The six adhesive sites for CO<sub>2</sub> onto the CsPbBr<sub>3</sub>/CdSe heterojunction and corresponding adhesive energies.



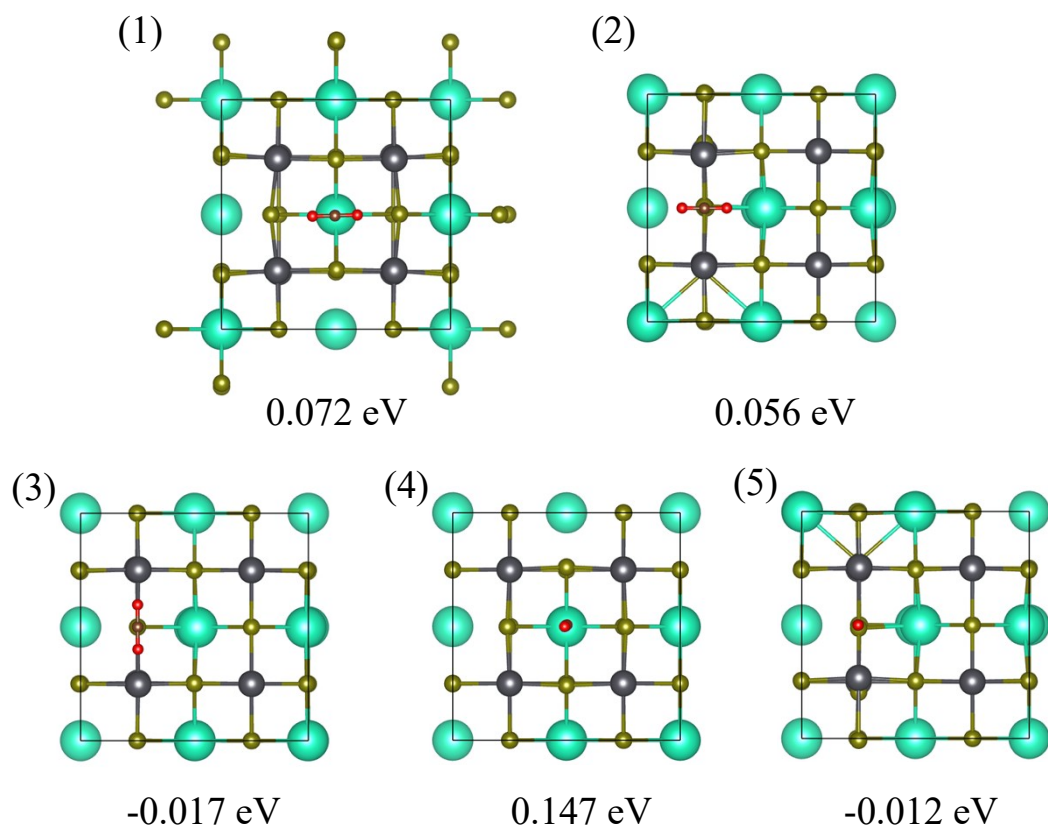

**Fig. S16** The five adhesive sites for CO<sub>2</sub> onto the CsPbBr<sub>3</sub> QDs and corresponding adhesive energies.

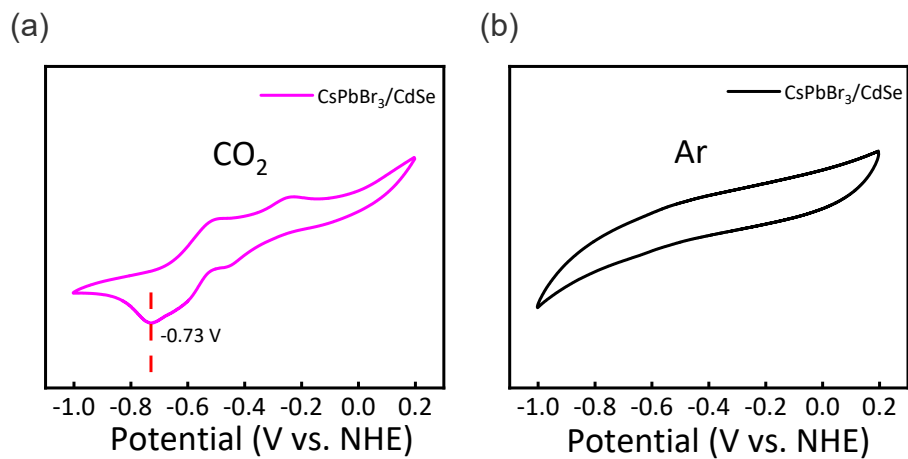

**Fig. S17** Cyclic voltammogram curve of CsPbBr<sub>3</sub>/CdSe heterojunction photocatalyst under CO<sub>2</sub> atmosphere and Ar atmosphere, respectively.

**Table S1** Adhesive energies from different adhesive sites for CO<sub>2</sub> onto the CsPbBr<sub>3</sub> QDs and CsPbBr<sub>3</sub>/CdSe heterojunction.

| Site | CsPbBr <sub>3</sub> | CsPbBr <sub>3</sub> /CdSe |
|------|---------------------|---------------------------|
| 1    | 0.072 eV            | 0.042 eV                  |
| 2    | 0.056 eV            | 0.196 eV                  |
| 3    | -0.017 eV           | -0.120 eV                 |
| 4    | 0.147 eV            | 0.094 eV                  |
| 5    | -0.012 eV           | -0.217 eV                 |
| 6    | --                  | 0.351 eV                  |

**Table S2** A summary of the photocatalytic CO<sub>2</sub> reduction performances by metal halide perovskites photocatalysts.

| Photocatalyst                                                               | Solvent                                           | Light source                                              | Products and Yield                      |                 |                | Refs.                                      |
|-----------------------------------------------------------------------------|---------------------------------------------------|-----------------------------------------------------------|-----------------------------------------|-----------------|----------------|--------------------------------------------|
|                                                                             |                                                   |                                                           | (μmol g <sup>-1</sup> h <sup>-1</sup> ) |                 |                |                                            |
|                                                                             |                                                   |                                                           | CO                                      | CH <sub>4</sub> | H <sub>2</sub> |                                            |
| CsPbBr <sub>3</sub> /CdSe                                                   | Ethyl acetate/H <sub>2</sub> O                    | 300 W Xe lamp, 420 nm<br>filter, 150 mW cm <sup>-2</sup>  | 38.43                                   | 8.52            | /              | <b>This work</b>                           |
| CsPbBr <sub>3</sub> /GO                                                     | Ethyl acetate                                     | 100 W Xe lamp, AM<br>1.5G filter                          | 4.89                                    | 2.47            | 0.13           | J. Am. Chem. Soc. 2017, 139, 5660          |
| CsPbBr <sub>3</sub> /BZN<br>W/MRGO                                          | CO <sub>2</sub> /H <sub>2</sub> O vapor           | 150 W Xe lamp, λ > 420<br>nm, 150 mW cm <sup>-2</sup>     | 0.85                                    | 6.29            | /              | J. Mater. Chem. A 2019, 7, 1 3762          |
| MAPbI <sub>3</sub> @PCN-<br>221(Fe <sub>0.2</sub> )                         | Ethyl acetate or<br>Acetonitrile/H <sub>2</sub> O | 300 W Xe lamp, 400 nm<br>filter, 100 mW cm <sup>-2</sup>  | 4.16                                    | 13.00           | /              | Angew. Chem. Int. Ed. 2019, 58, 9491       |
| CsPbBr <sub>3</sub> /MXen<br>e-20                                           | Ethyl acetate                                     | 300 W Xe-lamp, λ > 420<br>nm                              | 26.32                                   | 7.25            | /              | J. Phys. Chem. Lett. 2019, 10, 6590        |
| CsPbBr <sub>3</sub> @TiO-<br>CN                                             | Ethyl acetate/H <sub>2</sub> O                    | 300 W Xe lamp, 400 nm<br>filter, 100 mW cm <sup>-2</sup>  | 12.9                                    | /               | /              | RSC Adv. 2019, 9, 34342                    |
| CsPbBr <sub>3</sub> @g-<br>C <sub>3</sub> N <sub>4</sub>                    | Ethyl acetate                                     | 300 W Xe lamp                                             | 2.08                                    | 22.82           |                | Dalton Trans. 2019, 48, 14115              |
| CsPbBr <sub>3</sub> /UiO-<br>66(NH <sub>2</sub> )                           | Ethyl acetate/H <sub>2</sub> O                    | 300 W Xe lamp, λ > 420<br>nm                              | 8.21                                    | 0.26            | /              | Chem. Eng. J. 2019, 358, 1287              |
| Co <sub>2%</sub> @CsPbBr <sub>3</sub><br>/Cs <sub>4</sub> PbBr <sub>6</sub> | H <sub>2</sub> O solution                         | 300 W Xe lamp, 400 nm<br>filter, 100 mW cm <sup>-2</sup>  | 11.95                                   | /               | /              | ChemSusChem 2019, 12, 4769                 |
| CsPbBr <sub>3</sub> /Pd<br>NS(600)                                          | CO <sub>2</sub> /H <sub>2</sub> O vapor           | 150 W Xe lamp, λ > 420<br>nm, 150 mW cm <sup>-2</sup>     | 5.76                                    | 10.41           | 3.28           | ACS Appl. Energy Mater. 2018, 1, 5083-5089 |
| CsPbBr <sub>3</sub> @ZIF-<br>67                                             | CO <sub>2</sub> /H <sub>2</sub> O vapor           | 100 W Xe lamp<br>AM 1.5G, 150 mW cm <sup>-2</sup>         | 0.77                                    | 3.51            | /              | ACS Energy Lett. 2018, 3, 2656             |
| CsPbBr <sub>3</sub> /a-<br>TiO <sub>2</sub> (20)                            | Ethyl acetate/isopropanol                         | 150 W Xe lamp, AM<br>1.5G filter, 150 mW cm <sup>-2</sup> | 3.90                                    | 6.72            | 1.46           | Adv. Mater. Interfaces 2018,               |

|                                                          |                                         |                                                 |      |      |     |                                            |
|----------------------------------------------------------|-----------------------------------------|-------------------------------------------------|------|------|-----|--------------------------------------------|
|                                                          |                                         |                                                 |      |      |     | 1801015                                    |
| Fe <sup>2+</sup> : CsPbBr <sub>3</sub>                   | Ethyl acetate/H <sub>2</sub> O          | 450 W Xe-lamp, 150 mW cm <sup>-2</sup>          | 3.2  | 6.1  | /   | <i>J. Phys. Chem. Lett.</i> 2019, 10, 7965 |
| Cs <sub>2</sub> AgBiBr <sub>6</sub>                      | Ethyl acetate                           | 100 W Xe-lamp, AM 1.5G, 150 mW cm <sup>-2</sup> | 2.35 | 1.60 | /   | <i>Small</i> 2018, 14, 1703762             |
| Cs <sub>2</sub> SnI <sub>6</sub> (1.0)/Sn S <sub>2</sub> | CH <sub>3</sub> OH/H <sub>2</sub> O     | 32 W UV lamp 305nm, 80.38 μW cm <sup>-2</sup>   | /    | 6.09 | /   | <i>J. Am. Chem. Soc.</i> 2019, 141, 13434  |
| Cs <sub>3</sub> Bi <sub>2</sub> I <sub>9</sub>           | CO <sub>2</sub> /H <sub>2</sub> O vapor | 32 W UV lamp 305nm, 80.38 μW cm <sup>-2</sup>   | 7.76 | 1.49 | /   | <i>J. Am. Chem. Soc.</i> 2019, 141, 20434  |
| CsPbBr <sub>3</sub>                                      | Ethyl acetate/H <sub>2</sub> O          | 300 W Xe lamp, AM 1.5 G filter                  | 4.3  | 1.5  | 0.1 | <i>Chem. Eur. J.</i> 2017, 23, 9481        |

## References

- [1] Y. Zhang, Q. Wang, D. Liu, Q. Wang, T. Li and Z. Wang, *Appl. Surf. Sci.*, 2020, 521, 146434.
- [2] Q. Xu, L. Zhang, B. Cheng, J. Fan and J. Yu, *Chem*, 2020, 6, 1543-1559.
- [3] S. Bai, J. Jiang, Q. Zhang and Y. Xiong, *Chem. Soc. Rev.*, 2015, 44, 2893-2939.
- [4] H. Yao, A. Lu, Z. Bai, J. Jiang, S. Qin, *Chinese Phys. B.*, 2022, 4, 046106.
- [5] J. Wang, J. Wang, N. Li, X. Du, J. Ma, C. He, Z. Li, *ACS Appl. Mater. Interfaces.*, 2020, 12, 31477-31485.
- [6] Q. Wang, J. Wang, J. C. Wang, X. Hu, Y. Bai, X. Zhong and Z. Li, *ChemSusChem*, 2021, 14, 1131-1139.
- [7] L. Zhou, Y. F. Xu, B. X. Chen, D. B. Kuang and C. Y. Su, *Small*, 2018, 14, 1703762.
